# Supplementary material for: Discover the Molecular Biomarker Associated with Cell Death and Extracellular Matrix Module in Ovarian Cancer
Source: Hindawi journal article supplement (doi:10.1155/2015/735689), 2015-01-01
Supplement: f1 [file 735689.f1.zip]

| Rank | Cox $p$ -value | FDR      | Gene ID  | #Nodes | #Edges |
|------|----------------|----------|----------|--------|--------|
| 1    | 8.69E-09       | 3.29E-04 | EDIL3    | 9      | 8      |
| 2    | 1.61E-08       | 6.58E-04 | FCHO1    | 13     | 12     |
| 3    | 3.79E-08       | 9.87E-04 | C6orf62  | 10     | 9      |
| 4    | 4.31E-08       | 1.32E-03 | ELMO2    | 15     | 16     |
| 5    | 9.28E-08       | 1.64E-03 | AZGP1    | 9      | 8      |
| 6    | 1.53E-07       | 1.97E-03 | CYR61    | 9      | 8      |
| 7    | 3.24E-07       | 2.30E-03 | CCL16    | 14     | 13     |
| 8    | 4.73E-07       | 2.63E-03 | AFP      | 14     | 13     |
| 9    | 7.96E-07       | 2.96E-03 | CROCC    | 12     | 11     |
| 10   | 1.27E-06       | 3.29E-03 | CLP1     | 11     | 10     |
| 11   | 1.67E-06       | 3.62E-03 | IL31RA   | 12     | 12     |
| 12   | 2.10E-06       | 3.95E-03 | CCL4     | 13     | 12     |
| 13   | 2.20E-06       | 4.28E-03 | CNOT10   | 9      | 8      |
| 14   | 2.36E-06       | 4.61E-03 | CTSF     | 10     | 11     |
| 15   | 2.51E-06       | 4.93E-03 | SUCLG1   | 9      | 8      |
| 16   | 2.52E-06       | 5.26E-03 | RASSF7   | 9      | 8      |
| 17   | 2.89E-06       | 5.59E-03 | USH1G    | 9      | 8      |
| 18   | 3.18E-06       | 5.92E-03 | CXCR3    | 12     | 12     |
| 19   | 3.25E-06       | 6.25E-03 | OPRL1    | 10     | 10     |
| 20   | 4.64E-06       | 6.58E-03 | APOD     | 8      | 7      |
| 21   | 4.67E-06       | 6.91E-03 | PZP      | 11     | 15     |
| 22   | 4.87E-06       | 7.24E-03 | NRD1     | 14     | 15     |
| 23   | 5.31E-06       | 7.57E-03 | ANKS4B   | 9      | 8      |
| 24   | 5.93E-06       | 7.89E-03 | HLA-DPB1 | 10     | 10     |
| 25   | 8.07E-06       | 8.22E-03 | MMP10    | 10     | 14     |
| 26   | 9.60E-06       | 8.55E-03 | MMP25    | 11     | 11     |
| 27   | 1.03E-05       | 8.88E-03 | C12orf35 | 14     | 13     |
| 28   | 1.07E-05       | 9.21E-03 | SPDEF    | 11     | 11     |
| 29   | 1.07E-05       | 9.54E-03 | RNASEL   | 11     | 11     |
| 30   | 1.14E-05       | 9.87E-03 | HHIP     | 6      | 5      |
| 31   | 1.31E-05       | 1.02E-02 | CXCL1    | 11     | 15     |
| 32   | 1.39E-05       | 1.05E-02 | SEMA4A   | 11     | 10     |
| 33   | 1.73E-05       | 1.09E-02 | RBP1     | 13     | 13     |
| 34   | 1.78E-05       | 1.12E-02 | CXCL5    | 10     | 14     |
| 35   | 2.26E-05       | 1.15E-02 | THBS2    | 10     | 14     |
| 36   | 2.32E-05       | 1.18E-02 | MMP26    | 11     | 15     |
| 37   | 2.48E-05       | 1.22E-02 | OMP      | 11     | 10     |
| 38   | 2.79E-05       | 1.25E-02 | SLC16A1  | 9      | 8      |
| 39   | 3.12E-05       | 1.28E-02 | RECK     | 10     | 14     |
| 40   | 3.39E-05       | 1.32E-02 | RAB32    | 13     | 13     |
| 41   | 3.42E-05       | 1.35E-02 | MMP12    | 10     | 9      |
| 42   | 4.26E-05       | 1.38E-02 | KISS1    | 11     | 15     |
| 43   | 4.43E-05       | 1.41E-02 | TIMM8A   | 11     | 11     |
| 44   | 4.51E-05       | 1.45E-02 | PTCH2    | 6      | 5      |
| 45   | 4.57E-05       | 1.48E-02 | SEC11A   | 9      | 8      |
| 46   | 5.09E-05       | 1.51E-02 | IGLL1    | 11     | 11     |
| 47   | 5.53E-05       | 1.55E-02 | PON1     | 13     | 13     |

|    |          |          |          |    |    |
|----|----------|----------|----------|----|----|
| 48 | 6.56E-05 | 1.58E-02 | TRIM3    | 11 | 10 |
| 49 | 7.78E-05 | 1.61E-02 | CCL2     | 14 | 13 |
| 50 | 8.65E-05 | 1.64E-02 | SRPX2    | 12 | 12 |
| 51 | 8.93E-05 | 1.68E-02 | RIC8B    | 10 | 9  |
| 52 | 9.65E-05 | 1.71E-02 | OSTM1    | 11 | 11 |
| 53 | 9.86E-05 | 1.74E-02 | CCL17    | 10 | 10 |
| 54 | 1.04E-04 | 1.78E-02 | KIAA0232 | 9  | 8  |
| 55 | 1.12E-04 | 1.81E-02 | PPIL1    | 10 | 10 |
| 56 | 1.13E-04 | 1.84E-02 | MOCS2    | 9  | 8  |
| 57 | 1.16E-04 | 1.88E-02 | LANCL1   | 8  | 7  |
| 58 | 1.31E-04 | 1.91E-02 | MPO      | 11 | 14 |
| 59 | 1.85E-04 | 1.94E-02 | HAGH     | 12 | 12 |
| 60 | 1.95E-04 | 1.97E-02 | SLC22A11 | 13 | 12 |
| 61 | 1.95E-04 | 2.01E-02 | ADAMTS5  | 12 | 16 |
| 62 | 2.15E-04 | 2.04E-02 | PABPN1   | 11 | 11 |
| 63 | 2.15E-04 | 2.07E-02 | MAEA     | 12 | 12 |
| 64 | 2.23E-04 | 2.11E-02 | TKT      | 12 | 12 |
| 65 | 2.51E-04 | 2.14E-02 | PTGDR    | 10 | 9  |
| 66 | 2.88E-04 | 2.17E-02 | ADAM2    | 11 | 11 |
| 67 | 2.94E-04 | 2.20E-02 | SCG3     | 11 | 14 |
| 68 | 3.30E-04 | 2.24E-02 | CBX7     | 10 | 10 |
| 69 | 3.60E-04 | 2.27E-02 | BSDC1    | 8  | 8  |
| 70 | 4.54E-04 | 2.30E-02 | PROC     | 14 | 14 |
| 71 | 5.47E-04 | 2.34E-02 | INHBB    | 15 | 16 |
| 72 | 8.61E-04 | 2.37E-02 | VHLL     | 15 | 14 |
| 73 | 9.00E-04 | 2.40E-02 | SAA4     | 10 | 12 |
| 74 | 1.15E-03 | 2.43E-02 | SFTPA1   | 14 | 14 |
| 75 | 1.21E-03 | 2.47E-02 | TMEM67   | 5  | 4  |
| 76 | 1.37E-03 | 2.50E-02 | PCYT2    | 2  | 1  |
| 77 | 1.53E-03 | 2.53E-02 | PNOC     | 7  | 7  |
| 78 | 1.55E-03 | 2.57E-02 | F2RL3    | 14 | 14 |
| 79 | 1.70E-03 | 2.60E-02 | TFR2     | 11 | 10 |
| 80 | 1.71E-03 | 2.63E-02 | CLGN     | 7  | 8  |
| 81 | 1.76E-03 | 2.66E-02 | LMBR1L   | 12 | 14 |
| 82 | 1.85E-03 | 2.70E-02 | HIST1H1C | 11 | 10 |
| 83 | 1.88E-03 | 2.73E-02 | RGS17    | 6  | 5  |
| 84 | 1.88E-03 | 2.76E-02 | PHEX     | 9  | 8  |
| 85 | 2.34E-03 | 2.80E-02 | CX3CL1   | 2  | 1  |
| 86 | 2.56E-03 | 2.83E-02 | CBLN3    | 3  | 2  |
| 87 | 2.72E-03 | 2.86E-02 | HABP2    | 9  | 9  |
| 88 | 2.75E-03 | 2.89E-02 | CPN2     | 10 | 9  |
| 89 | 2.78E-03 | 2.93E-02 | KAL1     | 10 | 12 |
| 90 | 2.85E-03 | 2.96E-02 | RXFP4    | 9  | 11 |
| 91 | 2.93E-03 | 2.99E-02 | THBD     | 14 | 15 |
| 92 | 3.00E-03 | 3.03E-02 | MICB     | 7  | 6  |
| 93 | 3.33E-03 | 3.06E-02 | BSN      | 13 | 12 |

|     |          |          |          |    |    |
|-----|----------|----------|----------|----|----|
| 94  | 3.45E-03 | 3.09E-02 | POLK     | 12 | 12 |
| 95  | 3.46E-03 | 3.13E-02 | FZD6     | 8  | 8  |
| 96  | 3.55E-03 | 3.16E-02 | CRYBA1   | 6  | 5  |
| 97  | 3.66E-03 | 3.19E-02 | SERPINE2 | 10 | 12 |
| 98  | 4.93E-03 | 3.22E-02 | F13B     | 8  | 11 |
| 99  | 5.19E-03 | 3.26E-02 | WNT6     | 9  | 8  |
| 100 | 5.92E-03 | 3.29E-02 | SFTPD    | 10 | 12 |
| 101 | 6.58E-03 | 3.32E-02 | REG1A    | 10 | 12 |
| 102 | 8.08E-03 | 3.36E-02 | RAET1G   | 8  | 7  |
| 103 | 8.64E-03 | 3.39E-02 | NPNT     | 12 | 15 |
| 104 | 8.69E-03 | 3.42E-02 | COL6A3   | 11 | 14 |
| 105 | 8.95E-03 | 3.45E-02 | XCL1     | 11 | 12 |
| 106 | 9.34E-03 | 3.49E-02 | CCL20    | 11 | 12 |
| 107 | 9.61E-03 | 3.52E-02 | CHID1    | 2  | 1  |
| 108 | 9.90E-03 | 3.55E-02 | P4HA3    | 9  | 11 |
| 109 | 1.03E-02 | 3.59E-02 | GNRH1    | 10 | 12 |
| 110 | 1.06E-02 | 3.62E-02 | HPN      | 10 | 12 |
| 111 | 1.28E-02 | 3.65E-02 | IL10     | 15 | 19 |
| 112 | 1.30E-02 | 3.68E-02 | CFHR1    | 11 | 12 |
| 113 | 1.31E-02 | 3.72E-02 | COL6A1   | 9  | 9  |
| 114 | 1.38E-02 | 3.75E-02 | TRHDE    | 11 | 13 |
| 115 | 1.41E-02 | 3.78E-02 | PRPF18   | 4  | 3  |
| 116 | 1.41E-02 | 3.82E-02 | GALNT6   | 9  | 11 |
| 117 | 1.44E-02 | 3.85E-02 | PCOLCE   | 9  | 9  |
| 118 | 1.66E-02 | 3.88E-02 | INHBE    | 10 | 12 |
| 119 | 1.93E-02 | 3.91E-02 | THBS3    | 9  | 12 |
| 120 | 1.98E-02 | 3.95E-02 | SELP     | 11 | 12 |
| 121 | 2.12E-02 | 3.98E-02 | TTC35    | 2  | 1  |
| 122 | 2.37E-02 | 4.01E-02 | KISS1R   | 10 | 13 |
| 123 | 2.44E-02 | 4.05E-02 | SPINK1   | 9  | 11 |
| 124 | 2.81E-02 | 4.08E-02 | AMY2A    | 3  | 2  |
| 125 | 3.08E-02 | 4.11E-02 | PPP3R2   | 2  | 1  |
| 126 | 3.16E-02 | 4.14E-02 | COL5A3   | 9  | 11 |
| 127 | 3.19E-02 | 4.18E-02 | CXCL2    | 11 | 12 |
| 128 | 3.41E-02 | 4.21E-02 | SAA1     | 13 | 15 |
| 129 | 3.76E-02 | 4.24E-02 | PRKD2    | 9  | 8  |
| 130 | 3.92E-02 | 4.28E-02 | GRPR     | 6  | 5  |
| 131 | 4.05E-02 | 4.31E-02 | WISP1    | 8  | 10 |
| 132 | 4.05E-02 | 4.34E-02 | PLA2R1   | 9  | 11 |
| 133 | 4.41E-02 | 4.38E-02 | LUM      | 9  | 11 |
| 134 | 4.73E-02 | 4.41E-02 | TNFAIP6  | 9  | 11 |
