# Supplementary material for: Discover the Molecular Biomarker Associated with Cell Death and Extracellular Matrix Module in Ovarian Cancer
Source: Hindawi journal article supplement (doi:10.1155/2015/735689), 2015-01-01
Supplement: f1 [file 735689.f1.zip]

Gene Symt Cox Score

|           |          |
|-----------|----------|
| GALNT10   | 9.99E-07 |
| AVPR1B    | 5.62E-06 |
| TLL1      | 1.87E-05 |
| ITGB8     | 2.27E-05 |
| RPS6KA2   | 3.83E-05 |
| MMRN1     | 5.17E-05 |
| RNASE2    | 1.19E-04 |
| ANGPTL3   | 1.38E-04 |
| PALB2     | 1.49E-04 |
| C5AR1     | 1.74E-04 |
| GAS1      | 2.80E-04 |
| FZD1      | 2.84E-04 |
| HABP2     | 3.16E-04 |
| EIF3K     | 3.26E-04 |
| MYL2      | 3.52E-04 |
| PPP3CA    | 3.63E-04 |
| WIPF2     | 3.98E-04 |
| DOM3Z     | 4.36E-04 |
| SNX24     | 4.36E-04 |
| QKI       | 4.37E-04 |
| RAB11FIP5 | 4.41E-04 |
| P2RY12    | 5.22E-04 |
| PDGFRA    | 5.84E-04 |
| CX3CR1    | 6.17E-04 |
| KCNA1     | 6.50E-04 |
| SHMT2     | 6.94E-04 |
| TGFBR2    | 7.10E-04 |
| PRLR      | 7.37E-04 |
| HNF4A     | 7.40E-04 |
| CALB2     | 7.65E-04 |
| CBLN4     | 8.41E-04 |
| SAMD4B    | 8.81E-04 |
| KCTD15    | 9.04E-04 |
| KCTD13    | 1.00E-03 |
| GRIA1     | 1.02E-03 |
| QPRT      | 1.02E-03 |
| ITSN1     | 1.02E-03 |
| PHKA1     | 1.07E-03 |
| IGFBP4    | 1.10E-03 |
| MYH1      | 1.13E-03 |
| HYI       | 1.18E-03 |
| WISP1     | 1.23E-03 |
| CLEC5A    | 1.29E-03 |
| APC       | 1.37E-03 |
| PTGER3    | 1.38E-03 |
| KIF22     | 1.38E-03 |
| RAB31     | 1.40E-03 |
| MARCKSL1  | 1.53E-03 |
| F13B      | 1.64E-03 |

|          |          |
|----------|----------|
| MSR1     | 1.72E-03 |
| MED1     | 1.77E-03 |
| ESM1     | 1.79E-03 |
| HSPB7    | 1.82E-03 |
| XRCC6BP1 | 1.94E-03 |
| EFEMP1   | 1.96E-03 |
| GALNTL2  | 1.97E-03 |
| DKK2     | 1.98E-03 |
| IL31RA   | 1.99E-03 |
| RAD1     | 2.00E-03 |
| RGS4     | 2.07E-03 |
| NRG4     | 2.12E-03 |
| AEBP2    | 2.12E-03 |
| IGSF21   | 2.13E-03 |
| SELP     | 2.16E-03 |
| PDIA4    | 2.17E-03 |
| PABPN1   | 2.19E-03 |
| MYPN     | 2.22E-03 |
| FGF5     | 2.26E-03 |
| PDGFD    | 2.26E-03 |
| TEAD1    | 2.28E-03 |
| CDK4     | 2.31E-03 |
| CACNA1G  | 2.32E-03 |
| CD93     | 2.33E-03 |
| WDR77    | 2.38E-03 |
| KIF3A    | 2.43E-03 |
| NFKBIB   | 2.43E-03 |
| ECH1     | 2.47E-03 |
| ZNF521   | 2.47E-03 |
| LMOD1    | 2.56E-03 |
| STAB1    | 2.60E-03 |
| NSUN4    | 2.67E-03 |
| INSM1    | 2.69E-03 |
| VSTM2L   | 2.70E-03 |
| CSNK1G3  | 2.70E-03 |
| ASAH1    | 2.70E-03 |
| MTMR8    | 2.72E-03 |
| STK3     | 2.91E-03 |
| PDIA5    | 2.91E-03 |
| HNF4G    | 2.99E-03 |
| CACNA1C  | 3.03E-03 |
| TGFBI    | 3.05E-03 |
| OLR1     | 3.08E-03 |
| PEX3     | 3.11E-03 |
| RABGEF1  | 3.16E-03 |
| BLOC1S1  | 3.18E-03 |
| TUFM     | 3.20E-03 |
| DAB2     | 3.22E-03 |
| EGR2     | 3.24E-03 |
| B4GALT3  | 3.25E-03 |

|          |          |
|----------|----------|
| BCL7A    | 3.27E-03 |
| PSMD8    | 3.36E-03 |
| ZFP36    | 3.40E-03 |
| UBR1     | 3.41E-03 |
| APBB2    | 3.43E-03 |
| TRIM27   | 3.56E-03 |
| MED29    | 3.57E-03 |
| SDPR     | 3.57E-03 |
| UBE2J1   | 3.62E-03 |
| AGXT     | 3.63E-03 |
| CASP2    | 3.68E-03 |
| CNTN1    | 3.73E-03 |
| CATSPER1 | 3.79E-03 |
| MYO5A    | 3.89E-03 |
| CCL15    | 3.97E-03 |
| JMJD5    | 4.03E-03 |
| APEX2    | 4.13E-03 |
| PPFIBP1  | 4.23E-03 |
| ZNF239   | 4.35E-03 |
| ANXA4    | 4.40E-03 |
| RNF8     | 4.43E-03 |
| PROCR    | 4.55E-03 |
| CTNBL1   | 4.55E-03 |
| BICD2    | 4.63E-03 |
| GNAI1    | 4.69E-03 |
| SLC25A10 | 4.74E-03 |
| FZD5     | 4.77E-03 |
| CLTCL1   | 4.81E-03 |
| LSM4     | 4.88E-03 |
| C1orf35  | 4.90E-03 |
| COL5A2   | 4.92E-03 |
| STAC2    | 4.97E-03 |
| ZNRD1    | 5.08E-03 |
| HTR2B    | 5.11E-03 |
| RNF5     | 5.23E-03 |
| APOD     | 5.33E-03 |
| ZNF365   | 5.39E-03 |
| ENOX1    | 5.48E-03 |
| RRAD     | 5.54E-03 |
| SH3D19   | 5.65E-03 |
| THPO     | 5.68E-03 |
| RHPN2    | 5.73E-03 |
| ZFP36L1  | 5.73E-03 |
| ZNF408   | 5.74E-03 |
| LBP      | 5.77E-03 |
| MAF      | 5.77E-03 |
| IL18R1   | 5.80E-03 |
| SLC22A3  | 5.82E-03 |
| NEDD4    | 5.88E-03 |
| PMF1     | 5.92E-03 |

|        |          |
|--------|----------|
| GAD1   | 5.94E-03 |
| WWP1   | 5.96E-03 |
| PTRF   | 5.96E-03 |
| FGF7   | 5.97E-03 |
| KCND2  | 5.97E-03 |
| PSG3   | 6.00E-03 |
| RELL1  | 6.07E-03 |
| SLA2   | 6.07E-03 |
| BNIP2  | 6.11E-03 |
| NEXN   | 6.18E-03 |
| NUAK1  | 6.24E-03 |
| SIRPA  | 6.30E-03 |
| MYL1   | 6.31E-03 |
| RIN2   | 6.32E-03 |
| PLXNB3 | 6.38E-03 |
| TGFBR1 | 6.50E-03 |
| MCM3   | 6.53E-03 |
| TMOD2  | 6.62E-03 |
| PRKG1  | 6.67E-03 |
| XRCC4  | 6.67E-03 |
| YIPF3  | 6.69E-03 |
| PDLIM3 | 6.69E-03 |
| DDX20  | 6.73E-03 |
| SNRPA1 | 6.74E-03 |
| TNRC4  | 6.77E-03 |
| ADAM9  | 6.82E-03 |
| SYT4   | 6.85E-03 |
| IL1R2  | 7.02E-03 |
| CSF1   | 7.07E-03 |
| GNG2   | 7.08E-03 |
| LINGO1 | 7.09E-03 |
| PI3    | 7.11E-03 |
| AQP1   | 7.14E-03 |
| SPP1   | 7.15E-03 |
| FN1    | 7.22E-03 |
| SNX22  | 7.23E-03 |
| RPS16  | 7.25E-03 |
| FGA    | 7.29E-03 |
| MGP    | 7.37E-03 |
| AEBP1  | 7.46E-03 |
| LIPC   | 7.49E-03 |
| PRR14  | 7.57E-03 |
| NUP160 | 7.67E-03 |
| PUF60  | 7.70E-03 |
| NLRP12 | 7.70E-03 |
| SHE    | 7.86E-03 |
| ZFP106 | 7.89E-03 |
| DLD    | 7.97E-03 |
| FAM46C | 7.99E-03 |
| DCN    | 8.07E-03 |

|          |          |
|----------|----------|
| RAD50    | 8.19E-03 |
| KATNAL1  | 8.26E-03 |
| USP9Y    | 8.27E-03 |
| MAPKBP1  | 8.35E-03 |
| THBS1    | 8.42E-03 |
| SPDEF    | 8.51E-03 |
| EZH1     | 8.55E-03 |
| PHLDB2   | 8.67E-03 |
| TREM2    | 8.71E-03 |
| CSF2     | 8.77E-03 |
| TBC1D10C | 8.81E-03 |
| DPM3     | 8.82E-03 |
| SSBP4    | 8.92E-03 |
| ACTN4    | 9.01E-03 |
| C8orf48  | 9.02E-03 |
| RCAN1    | 9.08E-03 |
| CCDC88B  | 9.17E-03 |
| RASSF8   | 9.19E-03 |
| C16orf53 | 9.22E-03 |
| ARHGAP29 | 9.24E-03 |
| AP4E1    | 9.36E-03 |
| GNG12    | 9.40E-03 |
| NUCB2    | 9.45E-03 |
| OTUB2    | 9.47E-03 |
| RHOU     | 9.52E-03 |
| CSDE1    | 9.61E-03 |
| FAP      | 9.62E-03 |
| ST6GAL1  | 9.64E-03 |
| NBL1     | 9.64E-03 |
| FCGR2A   | 9.84E-03 |
| HERC3    | 9.97E-03 |
| GFI1     | 1.00E-02 |
| ELK3     | 1.00E-02 |
| THBS2    | 1.01E-02 |
| GDPD2    | 1.01E-02 |
| SOCS5    | 1.01E-02 |
| CCDC53   | 1.02E-02 |
| CDC14B   | 1.02E-02 |
| MRVI1    | 1.02E-02 |
| RNASEL   | 1.02E-02 |
| KLHDC5   | 1.03E-02 |
| RASGRF1  | 1.04E-02 |
| PTPN13   | 1.04E-02 |
| FBXL18   | 1.05E-02 |
| BRP44L   | 1.05E-02 |
| C8B      | 1.06E-02 |
| GRLF1    | 1.06E-02 |
| AFF4     | 1.06E-02 |
| ZNF295   | 1.06E-02 |
| ABCF1    | 1.09E-02 |

|          |          |
|----------|----------|
| ALB      | 1.09E-02 |
| COL8A2   | 1.10E-02 |
| CYR61    | 1.12E-02 |
| CBX8     | 1.12E-02 |
| COL14A1  | 1.13E-02 |
| ZNF689   | 1.14E-02 |
| ANXA2    | 1.15E-02 |
| WWOX     | 1.16E-02 |
| OVGP1    | 1.17E-02 |
| WFDC2    | 1.17E-02 |
| MYH7     | 1.17E-02 |
| RFX4     | 1.19E-02 |
| RBBP4    | 1.19E-02 |
| RDBP     | 1.20E-02 |
| TXNL4B   | 1.20E-02 |
| EID3     | 1.21E-02 |
| UTY      | 1.21E-02 |
| DYX1C1   | 1.22E-02 |
| HBG2     | 1.23E-02 |
| VANGL1   | 1.23E-02 |
| COL1A2   | 1.23E-02 |
| PJA2     | 1.25E-02 |
| HNRNPC   | 1.25E-02 |
| ARHGAP17 | 1.25E-02 |
| BANF1    | 1.26E-02 |
| COX4NB   | 1.27E-02 |
| BAT5     | 1.28E-02 |
| IL1RL2   | 1.30E-02 |
| SSRP1    | 1.30E-02 |
| IRAK1BP1 | 1.31E-02 |
| MEA1     | 1.33E-02 |
| HGF      | 1.33E-02 |
| HUS1B    | 1.35E-02 |
| TOE1     | 1.35E-02 |
| NEBL     | 1.35E-02 |
| ERBB2    | 1.36E-02 |
| NSF      | 1.36E-02 |
| PCOLCE   | 1.38E-02 |
| FRK      | 1.39E-02 |
| BRD2     | 1.39E-02 |
| GRIA3    | 1.40E-02 |
| HTRA1    | 1.40E-02 |
| NKX2-2   | 1.40E-02 |
| GALNT5   | 1.40E-02 |
| AFAP1    | 1.41E-02 |
| IL12A    | 1.41E-02 |
| PDILT    | 1.42E-02 |
| TTN      | 1.42E-02 |
| COL8A1   | 1.42E-02 |
| PSG1     | 1.43E-02 |

|          |          |
|----------|----------|
| TJP1     | 1.43E-02 |
| EIF3J    | 1.44E-02 |
| TFB1M    | 1.44E-02 |
| FSTL3    | 1.44E-02 |
| TOM1L2   | 1.46E-02 |
| SUZ12    | 1.46E-02 |
| GRAP2    | 1.47E-02 |
| LY9      | 1.47E-02 |
| MEOX2    | 1.47E-02 |
| CUGBP1   | 1.49E-02 |
| AP3S1    | 1.49E-02 |
| MTMR9    | 1.49E-02 |
| HOXB3    | 1.50E-02 |
| KRAS     | 1.51E-02 |
| AKAP12   | 1.52E-02 |
| METTL1   | 1.52E-02 |
| CBX5     | 1.53E-02 |
| TRIT1    | 1.53E-02 |
| GALNT6   | 1.55E-02 |
| STK39    | 1.56E-02 |
| NLGN4X   | 1.56E-02 |
| SLC7A11  | 1.56E-02 |
| PALLD    | 1.57E-02 |
| TREM1    | 1.58E-02 |
| SCMH1    | 1.58E-02 |
| PARP2    | 1.58E-02 |
| SFRP2    | 1.59E-02 |
| ZHX3     | 1.60E-02 |
| WDR91    | 1.60E-02 |
| EHD2     | 1.62E-02 |
| PSMB5    | 1.63E-02 |
| ARHGAP19 | 1.63E-02 |
| FBXO30   | 1.63E-02 |
| COL11A1  | 1.64E-02 |
| CD38     | 1.65E-02 |
| VPS4B    | 1.66E-02 |
| FOXP4    | 1.66E-02 |
| ABCB8    | 1.66E-02 |
| FLNC     | 1.66E-02 |
| PHGDH    | 1.67E-02 |
| GTF3C1   | 1.68E-02 |
| MED19    | 1.68E-02 |
| WNT7B    | 1.68E-02 |
| PMPCB    | 1.69E-02 |
| PAK4     | 1.70E-02 |
| TOMM20   | 1.70E-02 |
| ZSCAN16  | 1.70E-02 |
| MOG      | 1.71E-02 |
| COPZ2    | 1.71E-02 |
| TACR1    | 1.71E-02 |

|           |          |
|-----------|----------|
| C7orf16   | 1.72E-02 |
| SNRPC     | 1.72E-02 |
| ALPL      | 1.74E-02 |
| FANCA     | 1.74E-02 |
| CD36      | 1.74E-02 |
| APEX1     | 1.74E-02 |
| CTGF      | 1.74E-02 |
| CCDC127   | 1.74E-02 |
| TFPI2     | 1.75E-02 |
| PLN       | 1.75E-02 |
| GDF11     | 1.75E-02 |
| HOXB4     | 1.75E-02 |
| PTPRK     | 1.76E-02 |
| OLFML3    | 1.77E-02 |
| MBL2      | 1.78E-02 |
| CRLS1     | 1.78E-02 |
| PRPS1     | 1.78E-02 |
| CDH11     | 1.79E-02 |
| TGFB1I1   | 1.79E-02 |
| P4HA2     | 1.80E-02 |
| SLC18A2   | 1.80E-02 |
| COL6A1    | 1.81E-02 |
| NR1H3     | 1.81E-02 |
| PPARA     | 1.81E-02 |
| IRF4      | 1.82E-02 |
| HOPX      | 1.82E-02 |
| LATS2     | 1.82E-02 |
| PRDX5     | 1.83E-02 |
| RGS18     | 1.84E-02 |
| CCL11     | 1.85E-02 |
| NUFIP2    | 1.85E-02 |
| SRPK3     | 1.85E-02 |
| SMARCB1   | 1.85E-02 |
| PPP2R5D   | 1.85E-02 |
| RAC3      | 1.85E-02 |
| RXRG      | 1.86E-02 |
| HMBS      | 1.87E-02 |
| PLK2      | 1.87E-02 |
| SERPINA10 | 1.87E-02 |
| PTPN1     | 1.87E-02 |
| MYO9A     | 1.89E-02 |
| NUCB1     | 1.89E-02 |
| GRB7      | 1.90E-02 |
| FCER1A    | 1.90E-02 |
| RUNX1     | 1.90E-02 |
| RECQL     | 1.90E-02 |
| NRK       | 1.92E-02 |
| SH2D4A    | 1.92E-02 |
| SH2B1     | 1.92E-02 |
| NMU       | 1.93E-02 |



|          |          |
|----------|----------|
| PPIC     | 1.94E-02 |
| MMP12    | 1.94E-02 |
| LCMT1    | 1.95E-02 |
| CTSA     | 1.95E-02 |
| ISL2     | 1.95E-02 |
| TARBP2   | 1.96E-02 |
| GPR1     | 1.97E-02 |
| COL5A1   | 1.99E-02 |
| ZNF76    | 2.01E-02 |
| WDR12    | 2.01E-02 |
| PTPRD    | 2.02E-02 |
| EPB41L3  | 2.02E-02 |
| SPARCL1  | 2.02E-02 |
| RINT1    | 2.04E-02 |
| EFNA4    | 2.04E-02 |
| MS4A7    | 2.06E-02 |
| PMP22    | 2.08E-02 |
| ADAM2    | 2.10E-02 |
| AGTR1    | 2.10E-02 |
| EMILIN1  | 2.11E-02 |
| SVIL     | 2.11E-02 |
| RGPD5    | 2.12E-02 |
| CRYAB    | 2.12E-02 |
| GDF6     | 2.13E-02 |
| ZBTB16   | 2.13E-02 |
| SDCBP2   | 2.13E-02 |
| NTRK2    | 2.14E-02 |
| FAM127A  | 2.15E-02 |
| CSNK1A1L | 2.15E-02 |
| SIM1     | 2.16E-02 |
| SCN4B    | 2.16E-02 |
| NIPSNAP1 | 2.16E-02 |
| TMEM67   | 2.16E-02 |
| UNC5CL   | 2.17E-02 |
| TASP1    | 2.17E-02 |
| MYOM2    | 2.18E-02 |
| PAXIP1   | 2.19E-02 |
| EPHA4    | 2.19E-02 |
| HOXB2    | 2.20E-02 |
| SIX3     | 2.20E-02 |
| CSNK1G1  | 2.21E-02 |
| CBLN1    | 2.21E-02 |
| PLAUR    | 2.21E-02 |
| KRR1     | 2.23E-02 |
| ORC2L    | 2.23E-02 |
| SVEP1    | 2.26E-02 |
| TDP1     | 2.26E-02 |
| FZD3     | 2.27E-02 |
| ANTXR1   | 2.27E-02 |
| TRPM7    | 2.28E-02 |

|          |          |
|----------|----------|
| MEF2C    | 2.28E-02 |
| SNAI1    | 2.28E-02 |
| RUNX1T1  | 2.30E-02 |
| FABP4    | 2.30E-02 |
| DAGLB    | 2.30E-02 |
| PDPN     | 2.30E-02 |
| SPOCK1   | 2.31E-02 |
| PPP1R13L | 2.33E-02 |
| PTPN11   | 2.33E-02 |
| COPS8    | 2.35E-02 |
| ITGAM    | 2.36E-02 |
| PLXNC1   | 2.36E-02 |
| MEF2A    | 2.36E-02 |
| SRPRB    | 2.37E-02 |
| GMNN     | 2.37E-02 |
| CRYBA4   | 2.38E-02 |
| STAC3    | 2.39E-02 |
| PEX6     | 2.40E-02 |
| RNF183   | 2.41E-02 |
| DYNLRB1  | 2.41E-02 |
| WARS     | 2.41E-02 |
| MASP1    | 2.43E-02 |
| FAM131A  | 2.44E-02 |
| DSG3     | 2.44E-02 |
| JAM2     | 2.44E-02 |
| CEL      | 2.45E-02 |
| EXOC6B   | 2.47E-02 |
| KLF13    | 2.47E-02 |
| PAX3     | 2.49E-02 |
| C18orf56 | 2.49E-02 |
| C20orf3  | 2.50E-02 |
| PDPK1    | 2.50E-02 |
| RNF7     | 2.50E-02 |
| SENP2    | 2.51E-02 |
| ACOT7    | 2.51E-02 |
| GINS2    | 2.51E-02 |
| CLDN6    | 2.51E-02 |
| GALT     | 2.53E-02 |
| CETP     | 2.54E-02 |
| KCNB1    | 2.55E-02 |
| KIRREL   | 2.57E-02 |
| SMURF1   | 2.58E-02 |
| NR5A1    | 2.58E-02 |
| FHL5     | 2.59E-02 |
| GAS2     | 2.59E-02 |
| MYO18B   | 2.60E-02 |
| POLA2    | 2.64E-02 |
| PACSIN3  | 2.65E-02 |
| KIF13A   | 2.65E-02 |
| BYSL     | 2.66E-02 |

|           |          |
|-----------|----------|
| BSDC1     | 2.67E-02 |
| PIP5K1B   | 2.68E-02 |
| TNFRSF13E | 2.68E-02 |
| IGFBP6    | 2.69E-02 |
| SHPRH     | 2.69E-02 |
| POLD3     | 2.69E-02 |
| KRIT1     | 2.70E-02 |
| AK5       | 2.71E-02 |
| CCL17     | 2.71E-02 |
| EPB41L2   | 2.72E-02 |
| ADI1      | 2.72E-02 |
| HIRIP3    | 2.72E-02 |
| RP2       | 2.72E-02 |
| PARK2     | 2.72E-02 |
| RFX1      | 2.72E-02 |
| F11       | 2.73E-02 |
| SLC6A1    | 2.73E-02 |
| CDC5L     | 2.74E-02 |
| ACSL3     | 2.75E-02 |
| HSBP1     | 2.75E-02 |
| CREB3L3   | 2.76E-02 |
| EPS8      | 2.76E-02 |
| PRUNE2    | 2.77E-02 |
| KLF2      | 2.77E-02 |
| CRB2      | 2.78E-02 |
| FGF1      | 2.79E-02 |
| DMC1      | 2.79E-02 |
| HIC1      | 2.79E-02 |
| EDNRA     | 2.81E-02 |
| TEK       | 2.81E-02 |
| DPT       | 2.81E-02 |
| RYR1      | 2.82E-02 |
| MMP9      | 2.82E-02 |
| VGLL1     | 2.83E-02 |
| LUM       | 2.83E-02 |
| C3AR1     | 2.84E-02 |
| DARC      | 2.85E-02 |
| SCT       | 2.85E-02 |
| SAPS2     | 2.86E-02 |
| CHD6      | 2.86E-02 |
| PDE10A    | 2.86E-02 |
| EHMT2     | 2.87E-02 |
| PHF23     | 2.88E-02 |
| GEM       | 2.89E-02 |
| TUBGCP4   | 2.89E-02 |
| TRIB1     | 2.89E-02 |
| BRSK2     | 2.89E-02 |
| SH3PXD2A  | 2.89E-02 |
| MKS1      | 2.90E-02 |
| SSR4      | 2.90E-02 |

|         |          |
|---------|----------|
| COL3A1  | 2.90E-02 |
| PARD6B  | 2.90E-02 |
| KNG1    | 2.91E-02 |
| CELSR1  | 2.95E-02 |
| SEC22B  | 2.95E-02 |
| IFT20   | 2.96E-02 |
| THOC4   | 2.97E-02 |
| CITED4  | 2.97E-02 |
| AGR2    | 2.98E-02 |
| MYO16   | 2.98E-02 |
| PKD2    | 2.99E-02 |
| VEGFA   | 3.00E-02 |
| KCND1   | 3.00E-02 |
| SCLT1   | 3.01E-02 |
| TCP1    | 3.01E-02 |
| PLXNA1  | 3.02E-02 |
| EIF1    | 3.02E-02 |
| LCK     | 3.02E-02 |
| ZNF426  | 3.03E-02 |
| PSMB3   | 3.03E-02 |
| SH2B3   | 3.04E-02 |
| MTA2    | 3.04E-02 |
| GJB2    | 3.06E-02 |
| ZNFX1   | 3.06E-02 |
| P4HA3   | 3.07E-02 |
| SLC2A2  | 3.08E-02 |
| FAM124B | 3.09E-02 |
| SIAH2   | 3.09E-02 |
| GJB1    | 3.10E-02 |
| ARL8B   | 3.10E-02 |
| GADD45B | 3.11E-02 |
| ARHGEF2 | 3.12E-02 |
| TIMP3   | 3.12E-02 |
| ITGB1   | 3.13E-02 |
| GRP     | 3.15E-02 |
| CDH7    | 3.15E-02 |
| VIP     | 3.15E-02 |
| SLC4A8  | 3.15E-02 |
| SRCAP   | 3.15E-02 |
| FRMD6   | 3.16E-02 |
| EID1    | 3.17E-02 |
| SLIT2   | 3.21E-02 |
| EPB41L1 | 3.21E-02 |
| PKNOX1  | 3.23E-02 |
| CCBP2   | 3.23E-02 |
| CDKN1B  | 3.25E-02 |
| SH3BP2  | 3.27E-02 |
| MAP3K2  | 3.28E-02 |
| FANCG   | 3.29E-02 |
| PLEKHF2 | 3.30E-02 |

|         |          |
|---------|----------|
| TTC28   | 3.30E-02 |
| LRRFIP1 | 3.30E-02 |
| SLC1A2  | 3.31E-02 |
| CLDN11  | 3.31E-02 |
| MEP1A   | 3.32E-02 |
| CBX4    | 3.32E-02 |
| PDK1    | 3.33E-02 |
| PDHB    | 3.34E-02 |
| MMP25   | 3.35E-02 |
| RXRΒ    | 3.37E-02 |
| ALDOB   | 3.38E-02 |
| PATZ1   | 3.38E-02 |
| ZCCHC17 | 3.41E-02 |
| EFNA3   | 3.41E-02 |
| FKBP1   | 3.42E-02 |
| MDK     | 3.42E-02 |
| RBM39   | 3.43E-02 |
| UNC5C   | 3.44E-02 |
| COL25A1 | 3.46E-02 |
| CBX7    | 3.47E-02 |
| TNFRSF8 | 3.47E-02 |
| IKBKG   | 3.48E-02 |
| PPAP2A  | 3.48E-02 |
| TSSK6   | 3.48E-02 |
| AKAP11  | 3.49E-02 |
| STOM    | 3.49E-02 |
| HERC1   | 3.49E-02 |
| EID2    | 3.49E-02 |
| CD86    | 3.50E-02 |
| MUC7    | 3.50E-02 |
| DYNLT3  | 3.51E-02 |
| ZNF764  | 3.52E-02 |
| RETN    | 3.52E-02 |
| RECK    | 3.52E-02 |
| WISP2   | 3.53E-02 |
| TRPV4   | 3.55E-02 |
| RAD52   | 3.55E-02 |
| APH1A   | 3.56E-02 |
| MLNR    | 3.57E-02 |
| STARD13 | 3.58E-02 |
| MS4A1   | 3.58E-02 |
| PPIL1   | 3.58E-02 |
| F13A1   | 3.59E-02 |
| ERN1    | 3.60E-02 |
| TCF21   | 3.60E-02 |
| SIGLEC1 | 3.60E-02 |
| BEX2    | 3.62E-02 |
| PLA2R1  | 3.63E-02 |
| RGR     | 3.63E-02 |
| CD200R1 | 3.63E-02 |

|         |          |
|---------|----------|
| VPS24   | 3.64E-02 |
| SEC24B  | 3.66E-02 |
| BMP4    | 3.68E-02 |
| TIE1    | 3.68E-02 |
| IKBKAP  | 3.69E-02 |
| UBLCP1  | 3.71E-02 |
| RPL12   | 3.72E-02 |
| MYH2    | 3.72E-02 |
| ZBTB5   | 3.73E-02 |
| UACA    | 3.74E-02 |
| PAAF1   | 3.74E-02 |
| CCHCR1  | 3.74E-02 |
| ELMO2   | 3.75E-02 |
| CUL3    | 3.76E-02 |
| POLR2G  | 3.76E-02 |
| PTPRO   | 3.78E-02 |
| REPS2   | 3.78E-02 |
| VCAN    | 3.78E-02 |
| HTR7    | 3.80E-02 |
| PPP1R3A | 3.81E-02 |
| KLF6    | 3.82E-02 |
| RBBP6   | 3.82E-02 |
| UBD     | 3.84E-02 |
| BFSP1   | 3.85E-02 |
| SYNCRIP | 3.87E-02 |
| KEL     | 3.87E-02 |
| RAPGEF6 | 3.89E-02 |
| PCSK5   | 3.89E-02 |
| DUSP1   | 3.89E-02 |
| PAK1IP1 | 3.90E-02 |
| USP8    | 3.90E-02 |
| OSM     | 3.90E-02 |
| CAST    | 3.90E-02 |
| WNT4    | 3.90E-02 |
| FLOT2   | 3.91E-02 |
| NAV1    | 3.91E-02 |
| PRRX1   | 3.93E-02 |
| AGTPBP1 | 3.94E-02 |
| RALGPS1 | 3.95E-02 |
| ZNF609  | 3.97E-02 |
| CCL1    | 3.97E-02 |
| CD44    | 3.98E-02 |
| MLLT6   | 3.98E-02 |
| CD3E    | 3.99E-02 |
| PPIH    | 3.99E-02 |
| ATXN2L  | 4.00E-02 |
| HABP4   | 4.00E-02 |
| ELN     | 4.01E-02 |
| JUN     | 4.01E-02 |
| FNBP4   | 4.02E-02 |

|          |          |
|----------|----------|
| ODF2L    | 4.03E-02 |
| KIAA1217 | 4.03E-02 |
| ELF5     | 4.03E-02 |
| MCF2     | 4.03E-02 |
| TREML1   | 4.04E-02 |
| RASSF2   | 4.05E-02 |
| KAL1     | 4.06E-02 |
| NIF3L1   | 4.06E-02 |
| FRS3     | 4.06E-02 |
| PDLIM5   | 4.07E-02 |
| PDE4DIP  | 4.08E-02 |
| RAB13    | 4.08E-02 |
| SNRPA    | 4.10E-02 |
| DRD3     | 4.10E-02 |
| LSM2     | 4.11E-02 |
| RAI14    | 4.11E-02 |
| DNAJB2   | 4.12E-02 |
| TSHR     | 4.12E-02 |
| ILF2     | 4.13E-02 |
| SLC4A2   | 4.15E-02 |
| CCDC101  | 4.16E-02 |
| SLC22A9  | 4.17E-02 |
| FOXO1    | 4.17E-02 |
| IL24     | 4.17E-02 |
| PSME3    | 4.18E-02 |
| DCP2     | 4.18E-02 |
| HLA-DOB  | 4.19E-02 |
| ADAM12   | 4.20E-02 |
| GTF2H4   | 4.22E-02 |
| FANCF    | 4.22E-02 |
| FOSB     | 4.24E-02 |
| CNN1     | 4.25E-02 |
| LUC7L2   | 4.27E-02 |
| ADRA2A   | 4.27E-02 |
| GNG10    | 4.28E-02 |
| HOXA11   | 4.28E-02 |
| HOOK3    | 4.29E-02 |
| CDSN     | 4.29E-02 |
| RAB34    | 4.29E-02 |
| LSAMP    | 4.30E-02 |
| LTA4H    | 4.30E-02 |
| TSPAN6   | 4.32E-02 |
| GPS1     | 4.33E-02 |
| CALD1    | 4.34E-02 |
| CSNK1D   | 4.34E-02 |
| FAM69B   | 4.36E-02 |
| C16orf45 | 4.37E-02 |
| GABRB1   | 4.38E-02 |
| APOH     | 4.40E-02 |
| ICAM3    | 4.41E-02 |

|           |          |
|-----------|----------|
| EFNA5     | 4.41E-02 |
| CD79A     | 4.41E-02 |
| CRYBB2    | 4.42E-02 |
| ITGA5     | 4.44E-02 |
| MRPS12    | 4.44E-02 |
| PODXL2    | 4.45E-02 |
| NEK6      | 4.45E-02 |
| DLGAP4    | 4.46E-02 |
| TEF       | 4.46E-02 |
| LTA       | 4.47E-02 |
| PAICS     | 4.48E-02 |
| SLC26A8   | 4.49E-02 |
| MAPRE1    | 4.50E-02 |
| PEX19     | 4.50E-02 |
| LDB2      | 4.52E-02 |
| RRM2B     | 4.52E-02 |
| SNCA      | 4.53E-02 |
| PRPF3     | 4.53E-02 |
| NVL       | 4.54E-02 |
| ELP3      | 4.54E-02 |
| C10orf119 | 4.54E-02 |
| TARS      | 4.54E-02 |
| NR2F1     | 4.54E-02 |
| SART3     | 4.54E-02 |
| PSMA5     | 4.56E-02 |
| SNF8      | 4.57E-02 |
| SNRK      | 4.57E-02 |
| BCHE      | 4.59E-02 |
| UTP6      | 4.59E-02 |
| APOC2     | 4.60E-02 |
| SPARC     | 4.61E-02 |
| ISYNA1    | 4.61E-02 |
| PHKG2     | 4.62E-02 |
| MIF       | 4.62E-02 |
| ARHGAP21  | 4.62E-02 |
| KCNH5     | 4.65E-02 |
| ARFGEF1   | 4.67E-02 |
| SCAMP1    | 4.68E-02 |
| JUNB      | 4.69E-02 |
| MLLT4     | 4.69E-02 |
| SLC8A1    | 4.69E-02 |
| COL6A2    | 4.70E-02 |
| C17orf70  | 4.70E-02 |
| TDH       | 4.70E-02 |
| CEACAM3   | 4.73E-02 |
| SSBP1     | 4.76E-02 |
| FASTK     | 4.76E-02 |
| RGS2      | 4.76E-02 |
| AMHR2     | 4.76E-02 |
| PLEKHB1   | 4.78E-02 |



|          |          |
|----------|----------|
| IMPA1    | 4.79E-02 |
| DKC1     | 4.80E-02 |
| MARCKS   | 4.81E-02 |
| ITGB6    | 4.82E-02 |
| CD33     | 4.82E-02 |
| EMCN     | 4.84E-02 |
| RAB5B    | 4.86E-02 |
| CXCR4    | 4.86E-02 |
| TNFSF11  | 4.87E-02 |
| TRIM23   | 4.88E-02 |
| RB1      | 4.90E-02 |
| SYNJ1    | 4.92E-02 |
| MLH3     | 4.93E-02 |
| GOLM1    | 4.94E-02 |
| PDE3B    | 4.94E-02 |
| CLEC3B   | 4.94E-02 |
| ANKRD13A | 4.94E-02 |
| TSHB     | 4.94E-02 |
| TACC1    | 4.95E-02 |
| HOXC8    | 4.95E-02 |
| EFCAB6   | 4.96E-02 |
| CAB39    | 4.96E-02 |
| PSG9     | 4.97E-02 |
| UPK2     | 4.98E-02 |
| SRPK1    | 4.98E-02 |
| PLA2G5   | 4.99E-02 |
| FBLN1    | 4.99E-02 |
| WDR7     | 4.99E-02 |
| ATXN7L2  | 5.00E-02 |
