# Supplementary material for: Discover the Molecular Biomarker Associated with Cell Death and Extracellular Matrix Module in Ovarian Cancer
Source: Hindawi journal article supplement (doi:10.1155/2015/735689), 2015-01-01
Supplement: f1 [file 735689.f1.zip]

| Category     | Term       | Count | %        | PValue   | Genes      |
|--------------|------------|-------|----------|----------|------------|
| KEGG_PATHWAY | hsa04510:F | 29    | 3.51E+00 | 3.75E-05 | MYL2, ERBI |
| KEGG_PATHWAY | hsa04512:E | 17    | 2.06E+00 | 4.50E-05 | COL3A1, C  |
| KEGG_PATHWAY | hsa04530:1 | 18    | 2.18E+00 | 3.59E-03 | PARD6B, N  |

| List Total | Pop Hits | Pop Total | Fold Enrich | Bonferroni | Benjamini | FDR      |
|------------|----------|-----------|-------------|------------|-----------|----------|
| 317        | 201      | 5085      | 2.31E+00    | 5.90E-03   | 5.90E-03  | 4.51E-02 |
| 317        | 84       | 5085      | 3.25E+00    | 7.08E-03   | 3.55E-03  | 5.41E-02 |
| 317        | 134      | 5085      | 2.15E+00    | 4.33E-01   | 1.72E-01  | 4.24E+00 |
