# Supplementary material for: Discover the Molecular Biomarker Associated with Cell Death and Extracellular Matrix Module in Ovarian Cancer
Source: Biomed Res Int. 2015 Mar 16;2015:735689. doi: 10.1155/2015/735689 (PMC4378326; doi:10.1155/2015/735689)
Supplement: Supplementary file 1 — Supplemental Table 1: 134 compact survival-associated subnetworks by Survnet. Supplemental Table 2: 828 survival-associated genes by univariate Cox proportional hazards model. Supplemental Table 3: 29 cellular component terms, 199 biological process terms, 22 molecular function terms and 3 KEGG pathways enriched with survival-associated genes. [file 735689.f1.zip]

Archive with 3 entries (3 files):
- Supplement Table 1.pdf
- Supplement Table 2.pdf
- supplement Table 3.pdf
